# Supplementary figures and images for: Physical properties of RIr3 (R = Gd, Tb, Ho) compounds with coexisting polymorphic phases
Source: Royal Society of Chemistry journal article supplement (doi:10.1039/c9cp02348h), 2019-01-01

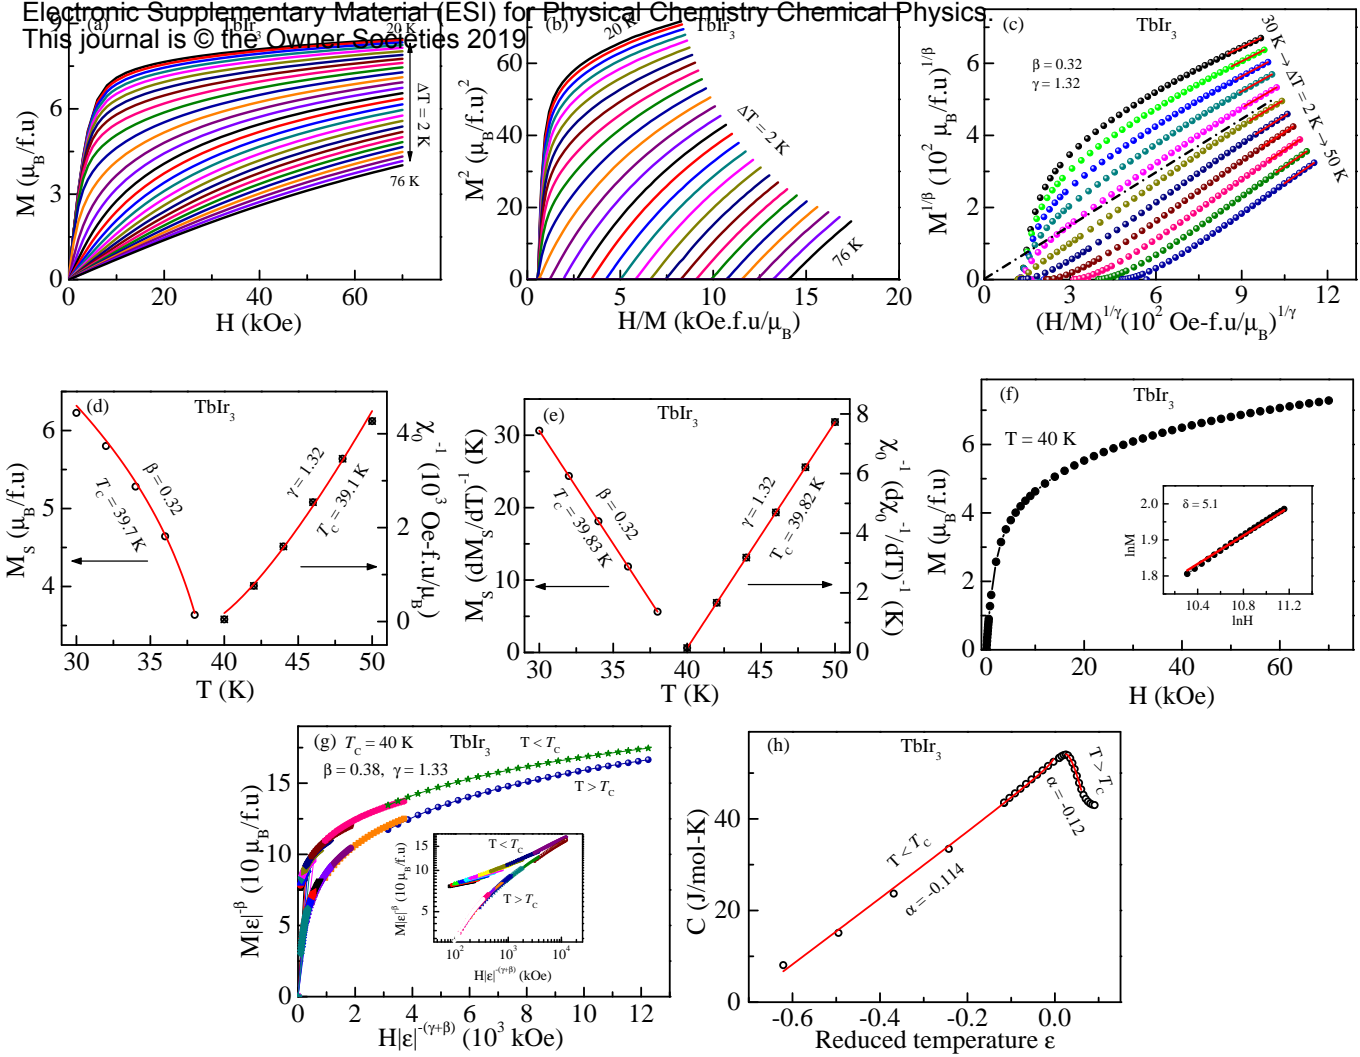

Supplement: c9cp02348h2.pdf [file c9cp02348h2.pdf]

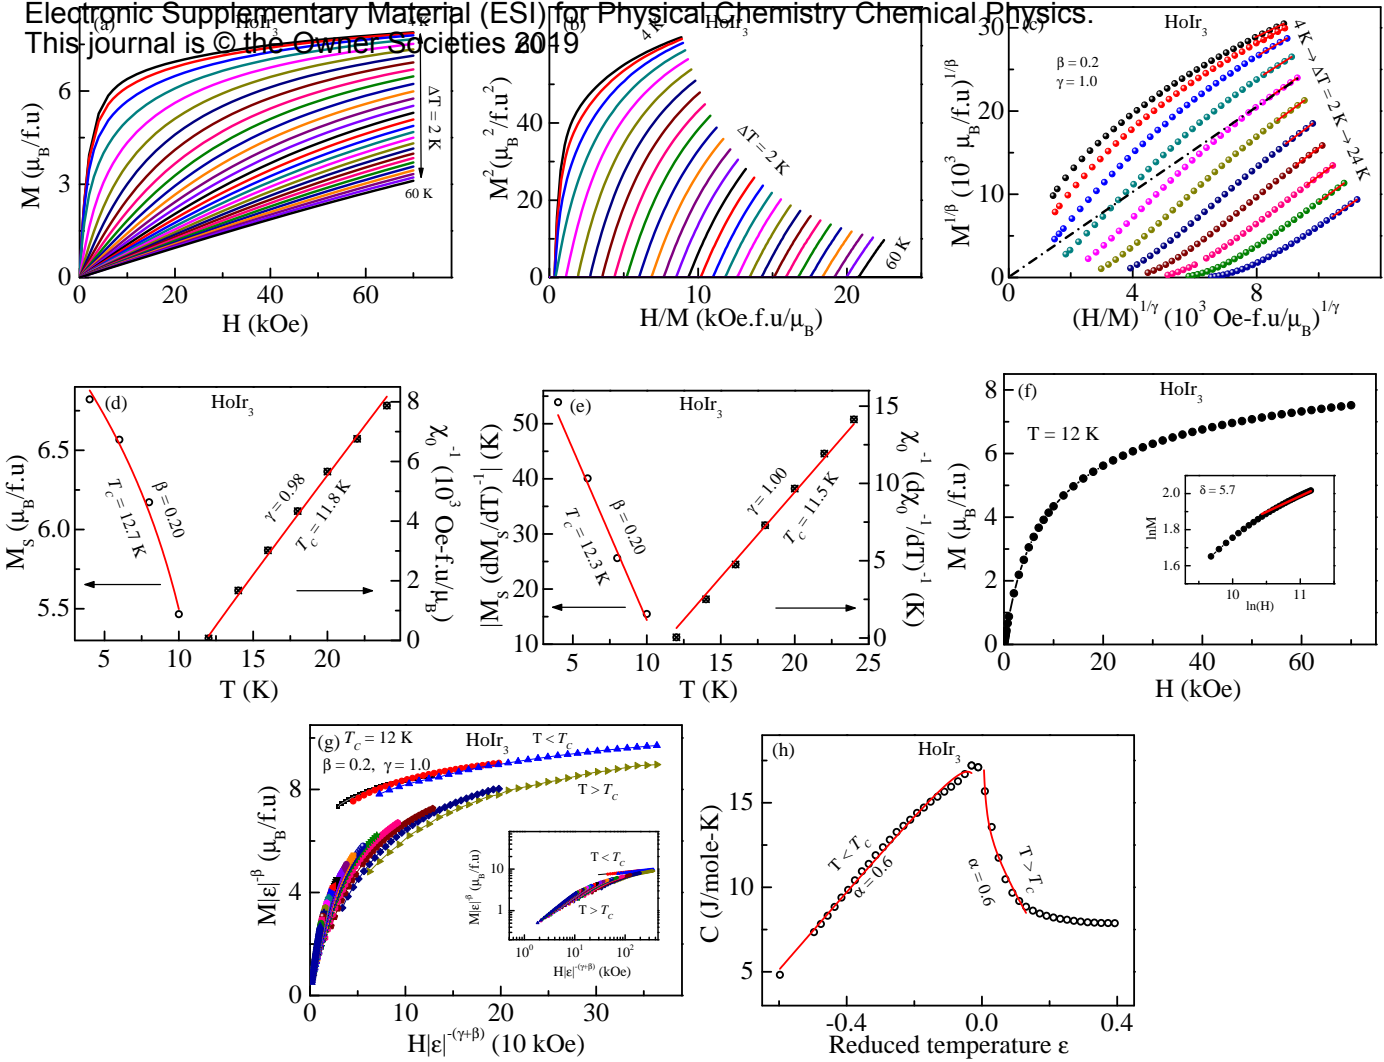

Supplement: c9cp02348h3.pdf [file c9cp02348h3.pdf]
